# Supplementary material
Source: publisher figshare collection journal article supplement (https://acs.figshare.com/ndownloader/files/6452616)
Supplement: Supplementary file 1 [file 6452616]

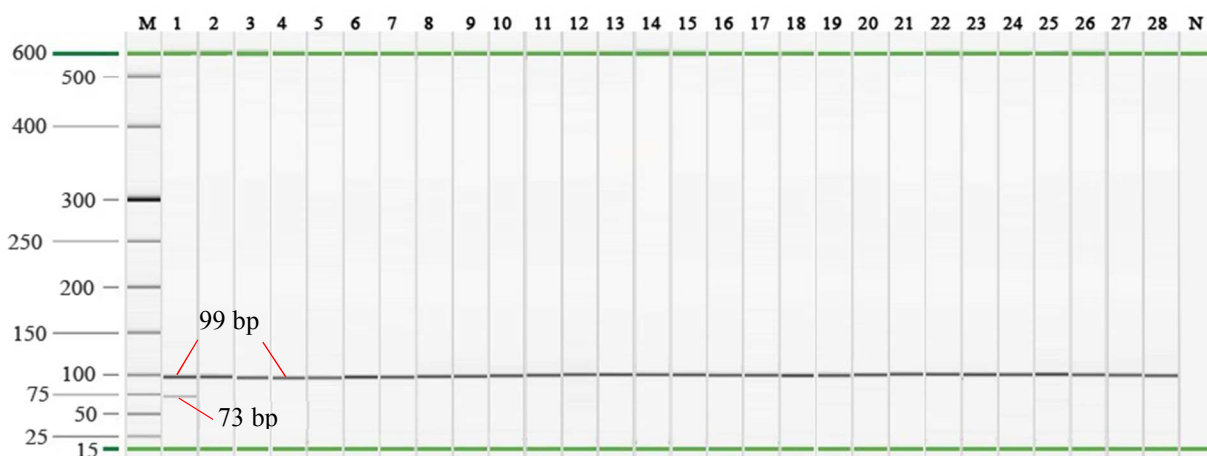

**Figure 6SM.** The specificity of the simplex PCR of pork ND5 (73 bp)-specific primer pair with DNA of different species. In the gel image, *lane M*, DNA ladder; *lane N*, negative template control; *lane 1*, PCR products of pork ND5 (73 bp) and endogenous control (99 bp); *lanes 2-28*, PCR products of endogenous control (99 bp) from beef, buffalo, goat, lamb, dog, cat, rabbit, monkey, donkey, chicken, duck, pigeon, quail, rat, salmon, tuna, cod, tilapia, rohu, pangas, frog, tortoise, wheat, onion, garlic, ginger and pepper, respectively.
